# Supplementary material for: Defect modification engineering on a laminar MoS2 film for optimizing thermoelectric properties
Source: Royal Society of Chemistry journal article supplement (doi:10.1039/c9tc06012j), 2020-01-01
Supplement: c9tc06012j1.pdf [file c9tc06012j1.pdf]

## Supporting Information

### Defect modification engineering on laminar MoS<sub>2</sub> film for optimizing thermoelectric properties

Wenjun Ding, ‡<sup>a</sup> Xia Li, ‡<sup>a</sup> Fengxing Jiang, <sup>a</sup> Peng Liu, <sup>a</sup> Peipei Liu, <sup>a</sup> Shuai Zhu, <sup>a</sup> Ge  
Zhang, <sup>a</sup> Congcong Liu <sup>\*a</sup> and Jingkun Xu <sup>\*a,b</sup>

<sup>a</sup> Jiangxi Key Laboratory of Organic Chemistry, Jiangxi Science and Technology  
Normal University, Nanchang 330013, P. R. China

Email: xujingkun@tsinghua.org.cn (J. Xu) and lcc.0705@163.com (C. Liu)

<sup>b</sup> College of Chemistry and Molecular Engineering, Qingdao University of Science &  
Technology, Qingdao 266042, P. R. China

[‡] These authors contributed equally to this work.

## Supporting Figures

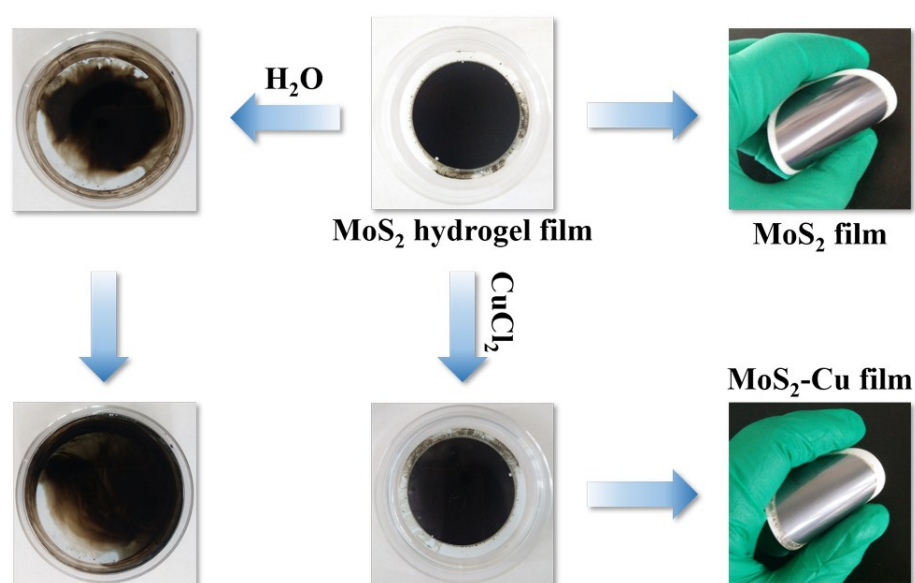

Figure S1 Photographs of MoS<sub>2</sub> hydrogel film soaked in 0.01 M CuCl<sub>2</sub> solution or H<sub>2</sub>O, and correspondingly dried MoS<sub>2</sub> and MoS<sub>2</sub>-Cu films.

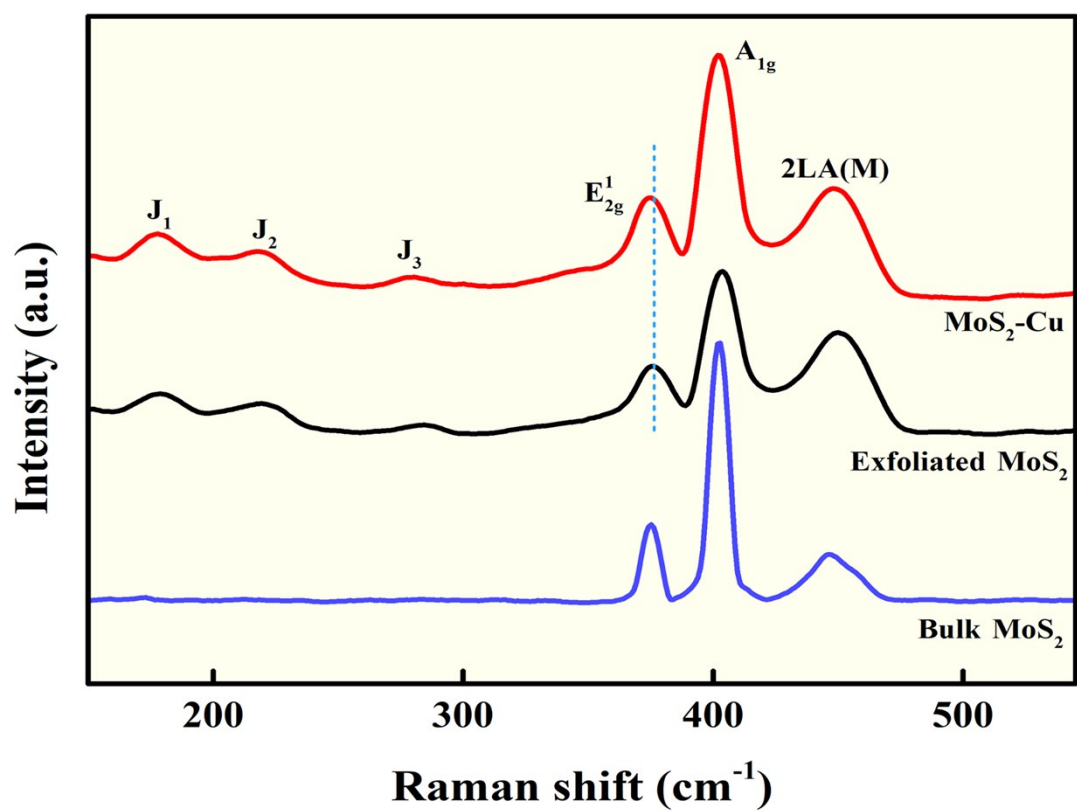

Figure S2 Raman patterns of bulk MoS<sub>2</sub>, exfoliated MoS<sub>2</sub> and MoS<sub>2</sub>-Cu films at 633 nm laser.

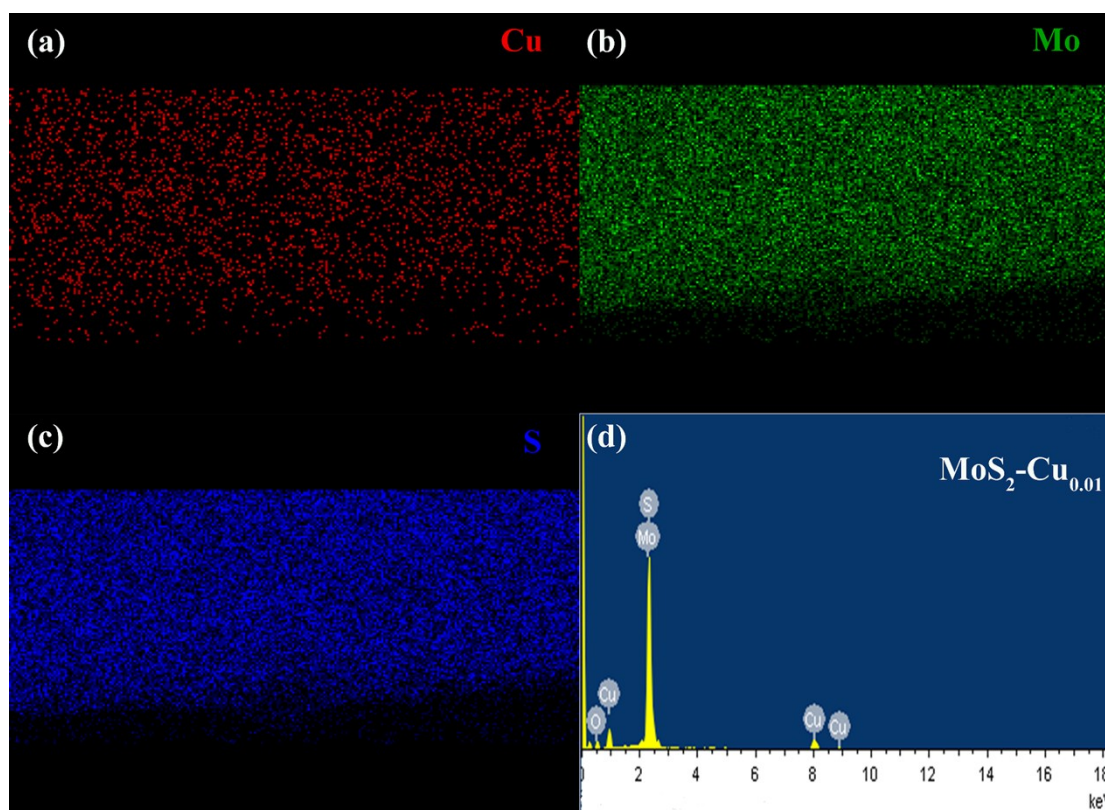

Figure S3 The corresponding element mapping images of (a) Cu, (b) Mo and (c) S and (d) EDX analysis of the  $\text{MoS}_2\text{-Cu}$  film.

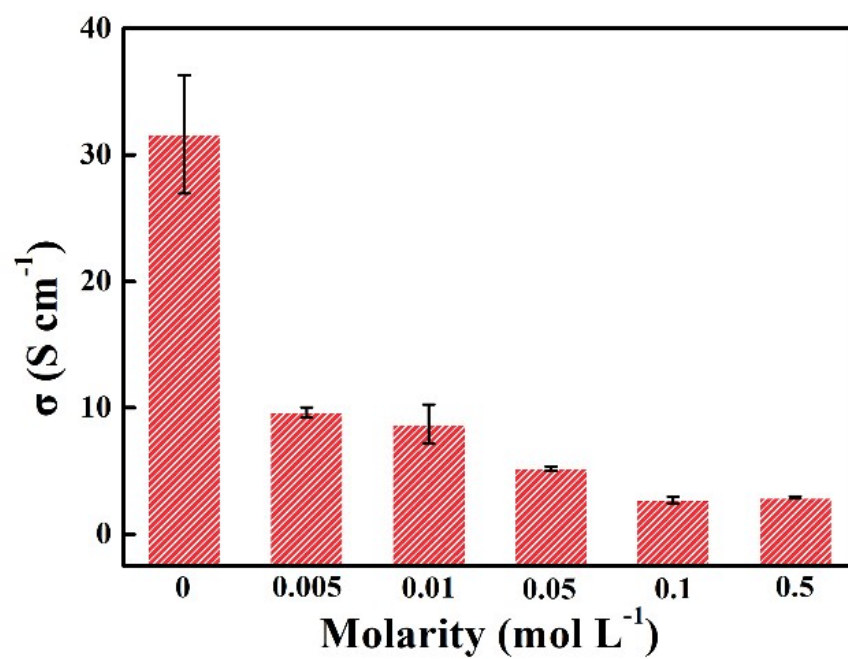

Figure S4 The electrical conductivity of  $\text{MoS}_2\text{-Cu}_x$  films.

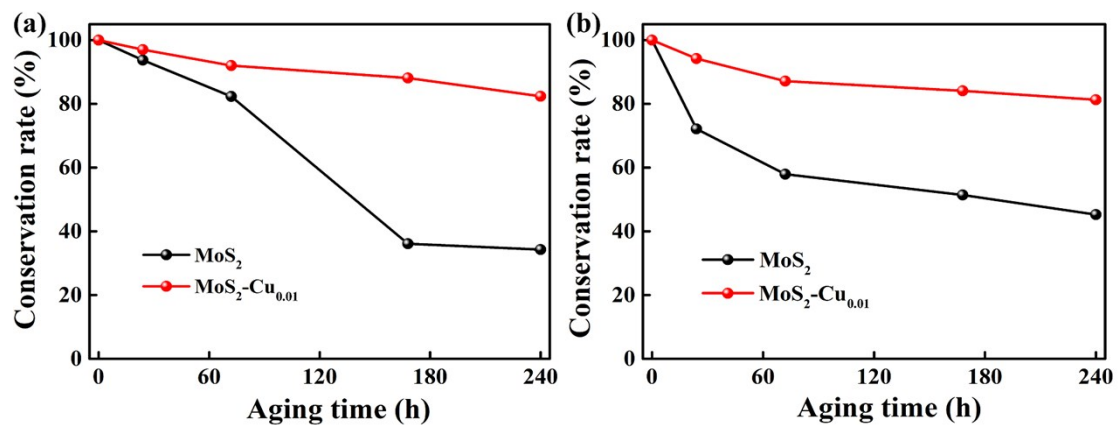

Figure S5 Compared thermoelectric properties of the MoS<sub>2</sub> and MoS<sub>2</sub>-Cu films versus aging time: (a) electrical conductivity and (b) Seebeck coefficient.

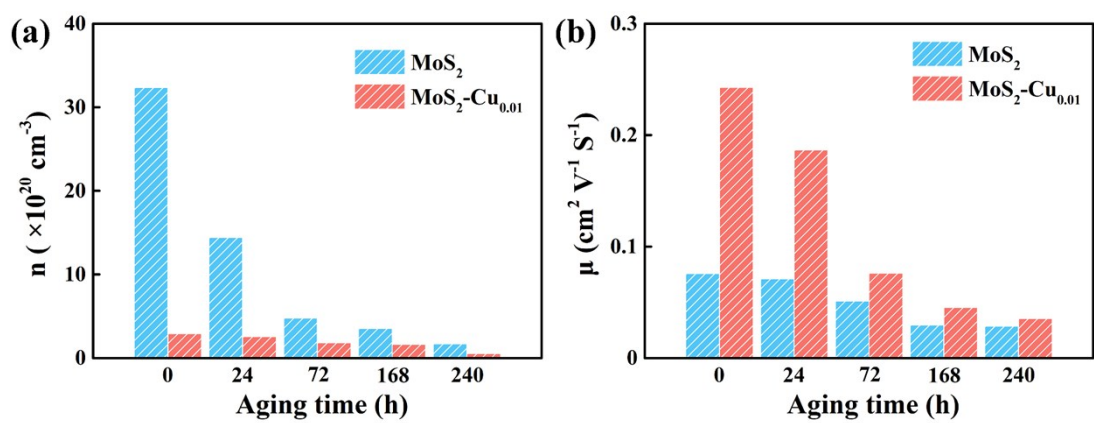

Figure S6 Compared (a) the carrier concentration and (b) the carrier mobility of MoS<sub>2</sub> and MoS<sub>2</sub>-Cu films versus aging time.
